# Supplementary material for: Exploring Myocardial Ischemia‐Reperfusion Injury Mechanism of Cinnamon by Network Pharmacology, Molecular Docking, and Experiment Validation
Source: Hindawi journal article supplement (doi:10.1155/2023/1066057), 2023-01-01
Supplement: f1 [file 1066057.f1.pdf]

## Supporting Information

### Exploring Myocardial Ischemia-Reperfusion Injury Mechanism of Cinnamon by Network Pharmacology, Molecular Docking, and Experiment Validation

#### Authors:

Tao Xue<sup>1+</sup>, Yan Xue<sup>2, 3, 4+</sup>, Yangyue Fang<sup>1</sup>, Chuanghong Lu<sup>2, 3, 4</sup>, Yu Fu<sup>1</sup>, Zefeng Lai<sup>6</sup>, Xiaojun Qin<sup>6</sup>, Feng Huang<sup>2, 3, 4\*</sup>, Zhiyu Zeng<sup>3, 4, 5\*</sup> and Jianping Huang<sup>1\*</sup>

#### Affiliations:

<sup>1</sup> Alibaba Business School, Hangzhou Normal University, Hangzhou 310000, China

<sup>2</sup> Department of Cardiology, The First Affiliated Hospital of Guangxi Medical University, Nanning 53000, China

<sup>3</sup> Guangxi Key Laboratory of Precision Medicine in Cardio-Cerebrovascular Diseases Control and Prevention, Nanning 53000, China

<sup>4</sup> Guangxi Clinical Research Center for Cardio-Cerebrovascular Diseases, Nanning 53000, China

<sup>5</sup> Department of Geriatric Cardiology, The First Affiliated Hospital of Guangxi Medical University, Nanning 53000, China

<sup>6</sup> Pharmaceutical College, Guangxi Medical University, Nanning 53000, China

#### Corresponding author:

Feng Huang, MD

Zhiyu Zeng, MD

Jianping Huang, Ph.D

#### Email:

huangfeng3000@126.com

zengzhiyu@gxmu.edu.cn

hjp@hznu.edu.cn

#### Acknowledgements

This work was supported by Guangxi Key Laboratory of Precision Medicine in Cardio-Cerebrovascular Diseases Control and Prevention (No. 19-245-34), Guangxi Clinical Research Center for Cardio-Cerebrovascular Diseases (No. AD17129014), the National Natural Science Foundation of China (No. 82070279, 81960082, 81760057, 61873080), and the Natural Science Foundation of Guangxi Province (No. 2016GXNSFAA380002, 2018GXNSFAA050059).

**Table S1 The Intersection Targets**

| GENE NAME |        |         |         |           |         |
|-----------|--------|---------|---------|-----------|---------|
| MBL2      | GP1BA  | SLC25A4 | APOA1   | CDON      | ADAM17  |
| MME       | JAK2   | MYC     | CAT     | PIAS1     | HMCN1   |
| GAPDH     | GSK3B  | EPOR    | MMP2    | SMAD1     | YAP1    |
| F2R       | LAMA4  | XIAP    | GCLC    | COL6A1    | ENO1    |
| SLC9A3R2  | VCAN   | FOXP2   | LEP     | S100P     | SENP3   |
| BMP6      | TEK    | SOCS3   | ENO2    | COL6A5    | MAOB    |
| PDE5A     | SIRT3  | CHI3L1  | NFE2L2  | NID2      | RHOB    |
| CIITA     | IRAK1  | ABCC8   | KCNJ5   | ANK2      | TRPM7   |
| EPRS1     | PRKCE  | IL37    | HGF     | KLRK1     | FHL2    |
| P2RY12    | MERTK  | ZC3H12A | ABCC9   | PDGFA     | TGFBI   |
| NOD2      | EPHA3  | FLNA    | RYR2    | CMKLR1    | TOLLIP  |
| IL1R1     | ABL1   | RHOA    | ADM     | VSIG4     | ITGA7   |
| STAT1     | MAP2K3 | VTN     | CD14    | SNAP25    | ALOX15  |
| NFKB1     | TNNI3K | ADCYAP1 | AGER    | AASS      | TJP1    |
| CALR      | ROCK1  | MMP14   | NOS1    | BAD       | HADHB   |
| CTF1      | LRP2   | UMOD    | ABCA1   | VEGFC     | WT1     |
| UTS2      | MGAM   | CASP7   | TIMP1   | ADAMTS5   | GRIK1   |
| SCARB1    | FRAS1  | IL11    | REN     | P4HB      | TRPC6   |
| ANGPT2    | ATR    | TSPO    | PARP1   | RHOD      | COL6A3  |
| CD59      | AXL    | CTSD    | MYH6    | MAP3K14   | CYP2B6  |
| THBS2     | MAP2K4 | CXCR3   | CLU     | PRELP     | KCNMA1  |
| ADORA1    | TYK2   | NAMPT   | PRKAG2  | TINAGL1   | AREG    |
| APP       | ROR1   | ENTPD1  | ITGA2B  | SPON1     | SHC1    |
| VIP       | GRIN2B | NDUFS4  | LGALS3  | ADAMTS20  | DIAPH1  |
| C1S       | CDK5   | AMPD1   | CD40LG  | COL20A1   | EIF2AK3 |
| CDKN1A    | ENG    | PRKCD   | APLN    | CHADL     | CFP     |
| EGR1      | PRKDC  | KLK1    | CALCA   | SSPOP     | IDO1    |
| ITGAL     | ADAM12 | IL3     | IL2     | ERCC2     | GPR55   |
| AIF1      | SLK    | SETD2   | GHRL    | ZFYVE9    | STAT5B  |
| ASIC1     | EGFR   | APLNR   | CYP2C9  | ATP2B4    | CD80    |
| TNFRSF1B  | GSDME  | TGM2    | HSPG2   | APAF1     | FGF4    |
| PDGFB     | CRP    | DUSP1   | PROCR   | RBM28     | ANGPTL4 |
| RAC1      | MPO    | SMAD4   | PLA2G7  | AIMP1     | GADD45A |
| S100A9    | LTA    | ACP1    | CDKN2A  | NDUFB2    | CCK     |
| GSTM1     | NOS3   | CASP2   | FLT1    | GRIA1     | LAMA1   |
| THPO      | VWF    | VCP     | CDH5    | GHRH      | SEMA7A  |
| BCL2L1    | CXCL8  | CAST    | CP      | DUSP6     | STAT5A  |
| NTN1      | HMOX1  | BAK1    | PTGIS   | TOMM40    | BCL2L15 |
| TNNI3     | NOS2   | ALOX12  | CD40    | TNFRSF10A | BLVRB   |
| SDC1      | SELP   | IL22    | CPT2    | BIRC2     | CPOX    |
| ABRAXAS2  | TP53   | RNF182  | HSPB1   | FOXC2     | P2RY11  |
| C5AR1     | LCN2   | NLRP1   | SMARCA4 | PPP1R15A  | AOC1    |

|          |         |           |          |         |          |
|----------|---------|-----------|----------|---------|----------|
| DNM1L    | IL18    | TNFSF12   | CD34     | CPT1B   | DUSP19   |
| MAX      | SCG2    | XRCC1     | SENP1    | KCNT2   | TFF3     |
| EEA1     | ANGPTL2 | TFAM      | PSMD9    | P2RY14  | BCL2A1   |
| CD4      | FGF19   | TLR3      | ITGAX    | MUC20   | CCR3     |
| SERPINA5 | PTGER2  | MAPK8IP3  | PRSS2    | CHD8    | PKD1     |
| LHFPL3   | CTTN    | ADGRL1    | MYBPC1   | MAT1A   | MYO1E    |
| RABEP1   | FPR2    | ERCC1     | SMPD2    | F12     | INSIG1   |
| FOXP1    | MIEF2   | EP300     | GSS      | CTHRC1  | DDOST    |
| SNAP29   | OGG1    | GRIK5     | EIF4G1   | CD300LB | LPAR1    |
| VTI1B    | LAIR1   | GNAI3     | PLCG1    | ANKRD23 | AP4M1    |
| NEO1     | DNM2    | ADCYAP1R1 | SLC29A4  | CCDC88B | SORT1    |
| IRAG2    | TNFSF9  | EDN2      | KCNQ4    | CLEC9A  | PDK2     |
| VAMP8    | PDIA2   | CYP2E1    | AKAP13   | MEGF10  | FOXO3    |
| NAPA     | RAMP1   | ABCC5     | ITGB3    | TET2    | ADGRB1   |
| KCNH1    | TRIM28  | CASP12    | B2M      | HTT     | NPHS1    |
| SPAM1    | OGDH    | PPP3CA    | GRIN2A   | DPPA2   | DYSF     |
| CACNA1H  | CA1     | POLB      | IL6R     | WTIP    | CAVIN1   |
| VAMP3    | CELSR1  | PKLR      | SMARCAL1 | USP53   | TP63     |
| OTOF     | AGFG1   | CHRNA3    | MEF2C    | SRXN1   | LITAF    |
| AKAP9    | ATG12   | ACTN2     | SERPINA3 | LGALS3  | CCS      |
| RIMS1    | MLKL    | ST6GAL1   | SST      | INAVA   | GRM5     |
| VAV3     | SLC5A2  | CENPE     | SLC12A2  | NECAB2  | BHLHE40  |
| OPA1     | JMJD1C  | DAG1      | F11      | TMEM119 | SCN10A   |
| CAV2     | RRAD    | ERCC5     | EDNRA    | THBS1   | CBLB     |
| MYH9     | MSRA    | GLP1R     | PAPPA    | ABCB1   | ADAMTS7  |
| KLK6     | PEPD    | GRN       | SIAH2    | TERT    | RARRES1  |
| KCNB1    | GPBR1   | ICAM3     | TOMM20   | SULT1A3 | TLR9     |
| KCNB2    | ATP5F1B | IGFBP1    | CA3      | GPX1    | GP6      |
| KCNC3    | MCUB    | IL4R      | KCNN1    | HSP90B1 | FSTL1    |
| KCNE2    | BCAR1   | BCR       | ADAMTSL1 | MYH10   | SPTLC1   |
| KCNG2    | KCNN3   | MITF      | NFAT5    | LONP1   | STIM1    |
| KCNG4    | NCK1    | PTN       | MAPK8IP1 | ATP1A1  | UBR1     |
| KCNH4    | GSTM3   | OMG       | ACACA    | KCNH2   | SIGLEC10 |
| KCNH6    | NFE2L1  | SKI       | GCH1     | MAP2    | SLC2A9   |
| KCNQ3    | GDNF    | BMI1      | CABIN1   | VIPR1   | MAGI2    |
| KCNQ5    | RETN    | CCN3      | MEF2A    | MYL4    | OLIG1    |
| THY1     | TRAF2   | PIM1      | MFF      | RLF     | TRPM4    |
| ETS1     | CD47    | PKM       | C1D      | USP6    | SMOC2    |
| VEGFD    | ABCB11  | SREBF1    | ADAMTS1  | KCNC4   | SLC17A8  |
| SOCS1    | TRPM2   | ZEB1      | CADPS    | TXNRD2  | TRAK1    |
| EIF2S1   | ABCB4   | ITGAV     | SLC16A1  | DEK     | STOML3   |
| CCNB1    | MPL     | YIPF6     | NPY1R    | JAG1    | MMP28    |
| CCL11    | GREM1   | FOXA2     | SLC4A4   | SCN11A  | AHI1     |
| ZNF354A  | TRAF7   | BDKRB1    | ARF4     | LGR5    | CYP27B1  |

|          |          |        |         |          |           |
|----------|----------|--------|---------|----------|-----------|
| VEGFA    | SARM1    | SIRT1  | CUL3    | APOL4    | HMOX2     |
| TSC2     | ANKRD1   | FAS    | TACR1   | EMILIN3  | ALDH9A1   |
| C4B      | SRC      | CCL3   | MLC1    | DDT      | CD69      |
| EPAS1    | NPR1     | HSPA4  | RIPK3   | CRHR2    | PROC      |
| MASP2    | MAPK9    | MAPT   | ADAMTS3 | GLRX     | NES       |
| CLCN3    | RIPK2    | ADRB1  | ATF6    | GCKR     | IL23A     |
| IKBKG    | TIE1     | PLA2G6 | IFIT3   | TLR7     | GAD1      |
| ATP2A1   | KIT      | SELPLG | FPR1    | PPP1CA   | ABCG2     |
| ADK      | ANO1     | LRP6   | SMPD1   | PNPLA8   | AHSG      |
| ERBB2    | MAPK11   | ACE2   | EGLN3   | DDIT4    | VEGFB     |
| LYN      | RAF1     | CCR5   | YBX1    | METTL14  | NLRX1     |
| ATP7A    | RYK      | EGF    | RBP3    | AKIP1    | IL18BP    |
| CCR1     | DSG1     | SH2B3  | TRPC5   | SIVA1    | GPX3      |
| TRPM8    | DCC      | HSPD1  | DGKQ    | SP3      | BAG1      |
| IL6      | MET      | CRYAB  | KL      | F11R     | FOXC1     |
| TNF      | YES1     | CASP9  | TRAF5   | SNHG12   | ATF4      |
| SERPINE1 | DDR1     | SDHB   | ODC1    | CD58     | GLO1      |
| IL10     | MAPK10   | NEFL   | YRDC    | GORASP1  | CXCL6     |
| SOD1     | GFAP     | IL13   | EEF2    | KCNJ1    | SPARC     |
| MMP9     | MAPK14   | TKT    | LNP1    | YWHAZ    | BGN       |
| ESR1     | CXCL1    | CSF1   | KCNF1   | CYGB     | COL14A1   |
| CCL2     | MAP2K1   | HSPA5  | KCNH5   | PSMA2    | NDRG4     |
| S100B    | LTF      | S100A8 | IL6ST   | AQP8     | GRP       |
| EDN1     | HSPB2    | IL5    | TXNRD1  | USP18    | TNFRSF12A |
| F3       | SIRPA    | KCNQ1  | SLC6A11 | MSRB1    | BMP4      |
| EPO      | CSK      | COL7A1 | ADGRL3  | IL18RAP  | PPIF      |
| F5       | PTPA     | BECN1  | SLCO1B3 | JMJD6    | E2F1      |
| LMNA     | PDGFRB   | FGF7   | GNAI2   | NDUFA4L2 | GNAI1     |
| IGF1     | ANG      | S1PR1  | CLDN4   | STK4     | LAMB2     |
| KNG1     | TTK      | VHL    | MT-CYB  | TRAF1    | SRF       |
| CXCL12   | THBD     | PSEN1  | PCSK2   | FKBP4    | RPS6KB1   |
| XDH      | OLR1     | PSAP   | APOE    | BFAR     | GJC1      |
| VCAM1    | ADAMTS13 | GZMB   | IDH2    | EIF4EBP1 | MCAM      |
| FGB      | CTNNB1   | CTSG   | PAX2    | SLC51B   | CTSS      |
| CCN2     | TLR2     | SORD   | CEBPB   | CCR2     | APOM      |
| F10      | PPARA    | TRPV4  | P2RX4   | CYP2C19  | HMGB2     |
| AGT      | AQP4     | CRH    | SEMA3A  | PLA2G2A  | ATF2      |
| PLG      | GLS      | KCNJ8  | SLC22A4 | SERPINF2 | CLEC4A    |
| ADRB2    | CYBB     | UCN    | PTER    | MMP13    | TFG       |
| SOD2     | DPP4     | ACHE   | MICU1   | LDLR     | CTH       |
| ALDH2    | ADORA3   | HTRA2  | GPR180  | CD163    | UTS2B     |
| SPP1     | CYSLTR2  | C3AR1  | WFIKKN1 | PCSK9    | CCL22     |
| CCL5     | NFKBIA   | PTGDS  | SLC6A4  | PNP      | ADAMTS8   |
| RSPO1    | FCN3     | SLC9A1 | ASCL1   | HDAC3    | BNIP3     |

---

|         |         |         |          |          |          |
|---------|---------|---------|----------|----------|----------|
| REG4    | NUCB2   | HSPA1A  | CACNA2D1 | SLC1A1   | MDM2     |
| WFIKKN2 | MARCHF5 | CCND1   | CEBPD    | ARRB1    | LGALS1   |
| EPC1    | FAM3A   | FOS     | GAD2     | ATP5F1E  | RUNX1    |
| PLA2G3  | TMEM123 | IRF5    | GLRA1    | MAP3K8   | TXN2     |
| APIP    | LTC4S   | DCN     | SERPIND1 | SERPING1 | SERPINF1 |
| SPEG    | GIP     | FASLG   | ITGB6    | BEST1    | NOD1     |
| FOXK1   | POMZP3  | MCU     | JUND     | NR4A2    | RUNX2    |
| MXRA8   | USO1    | TF      | PDE1A    | GPR31    | DLD      |
| OLFM2   | UBA52   | TIMP2   | PLA2G1B  | PF4      | IL9      |
| CREG1   | LHFPL6  | AHSP    | MMP7     | BDKRB2   | SIRT6    |
| PACC1   | UFD1    | PLAU    | CD6      | SERPINI1 | CLEC3B   |
| HPCAL4  | RAB8A   | BMP7    | HNF1B    | CTSL     | SLC22A3  |
| VNN1    | NAPG    | NPPC    | NOTCH1   | BDH1     | S1PR3    |
| CCL21   | ROPN1B  | CX3CR1  | TBL1X    | PRNP     | TIMP4    |
| CD93    | DOC2B   | MYD88   | PTGIR    | APOC3    | TMSB4X   |
| NPPB    | SNAP23  | FABP1   | HNF4A    | MYDGF    | TGIF1    |
| IL1B    | VPS33B  | TNNC1   | GAS6     | ACADS    | FEM1A    |
| NPPA    | NOX5    | FGF1    | VSNL1    | FXYD1    | ADAM10   |
| TGFB1   | ADAM9   | GSTP1   | P2RX2    | MYL3     | PTHLH    |
| HMGB1   | NMNAT3  | ADM2    | FAT1     | PCSK1    | P2RY1    |
| IFNG    | KCNC1   | LOX     | NACA     | IZUMO1   | GLRX2    |
| GCLM    | KCNC2   | IL15    | SGCD     | MYMX     | ATG5     |
| NGF     | KCND1   | RELA    | SQSTM1   | FAU      | COL15A1  |
| IL4     | KCND2   | IL7     | PROX1    | MAP1B    | C1R      |
| CYCS    | KCND3   | FOXO1   | RCAN1    | LHFPL1   | IL7R     |
| HAVCR1  | KCNE4   | LAMA2   | PSPN     | MFN1     | PLA2G10  |
| HTR2A   | KCNG3   | ELAVL1  | LRRFIP1  | STX6     | THAP5    |
| TXN     | KCNS1   | FCGR3B  | KCNK6    | NPLOC4   | GSTA2    |
| CBS     | KCNAB1  | DDIT3   | SYT7     | BNIP1    | PPP1CC   |
| CD46    | ITGA5   | GJB1    | PLSCR1   | VAMP7    | IMMT     |
| ANGPT1  | INPP5D  | SNCA    | LBX1     | PRDX6    | H2AX     |
| COL3A1  | EIF2A   | TFPI    | AIM2     | MMP12    | ADCY1    |
| CASP1   | PRSS1   | GAST    | SRP54    | PRKCQ    | HSPA1B   |
| IL1RN   | TMBIM6  | FBXO32  | ABCC4    | KCNE3    | AOX1     |
| BAX     | TBXAS1  | XBP1    | IL27RA   | EFNB2    | LAP3     |
| ITGB2   | HRH3    | OSM     | PNKP     | ID3      | HEXIM1   |
| CHAT    | CDKN1B  | IGFBP7  | CHRNA10  | CCNG1    | PSMA7    |
| GATA4   | CYP19A1 | PPIA    | OLIG2    | STC1     | HTR2B    |
| MIF     | CYP3A5  | MUC1    | HOPX     | STAT6    | PLSCR3   |
| IL17A   | MT-ATP6 | LRG1    | BHLHA15  | BTG2     | RGS16    |
| CXCL10  | ARG1    | ANXA2   | NMNAT1   | CCNE1    | LDHA     |
| CXCL2   | HLA-B   | SLC24A3 | LRRK2    | FOSL1    | DEFB4A   |
| CASP6   | GCG     | KLF4    | NR3C2    | ID1      | MMP1     |
| SCFD1   | CDC42   | RAB7A   | BCHE     | LGALS7   | IFNB1    |

|         |          |          |         |        |        |
|---------|----------|----------|---------|--------|--------|
| FOSL2   | TAC1     | CASP4    | AKR1B1  | NFIB   | HDAC6  |
| CD2AP   | S100A6   | FLNB     | ICAM1   | P2RX1  | SLC6A3 |
| MT-ATP8 | BLOC1S1  | LHX2     | APOB    | HMMR   | EGLN1  |
| MMP3    | TNNI1    | NR1H4    | CNR1    | SOX15  | CXCR2  |
| OXT     | HCRT     | BVES     | CNR2    | CCL13  | KDR    |
| CEL     | SETMAR   | RTN4R    | NR1H2   | PITX2  | ERN1   |
| C1QA    | AKT1S1   | SCGB3A2  | SHH     | KLF6   | FABP4  |
| EPHX1   | KCTD9    | DEFB103A | ADORA2A | CASP3  | PPARG  |
| FGFR4   | PTGS2    | GPR78    | TRPV1   | CASP8  | FABP3  |
| FGFR1   | HSP90AA1 | ACMSD    | MAPK8   | PRKCA  | PPARD  |
| CD74    | CHRM3    | PELI3    | FASN    | PON1   | PTGES  |
| PTPRZ1  | SCN5A    | SPINK6   | MAOA    | NR1H3  | LPL    |
| KDM6A   | PDE3A    | GFRAL    | TLR4    | HMGCR  | BDNF   |
| CRLF2   | OPRM1    | PTGS1    | TRPA1   | G6PD   | INS    |
| CD24    | BCL2     | ADORA2B  | ALOX5   | SLC6A2 | UCP2   |
| SP1     | JUN      | FABP2    | HSD11B1 | GPBAR1 |        |
| COL1A1  | AOC3     | IGF1R    | NR4A1   | SOAT1  |        |

---

**Table S2 he Data of Topological Parameters of The PPI Network**

| GENE   | BETWEENNESS | CLOSENESS   | DEGREE |
|--------|-------------|-------------|--------|
| MYC    | 22237.2381  | 0.00049554  | 297    |
| SIRT1  | 9664.312401 | 0.000457875 | 177    |
| MPO    | 1799.235328 | 0.000434783 | 121    |
| CCL2   | 5732.332608 | 0.000474834 | 245    |
| GAPDH  | 52889.71325 | 0.000537346 | 431    |
| APOB   | 3962.648919 | 0.000428449 | 106    |
| APOA1  | 2892.439967 | 0.000424268 | 99     |
| APOE   | 9514.033309 | 0.000461681 | 183    |
| CRP    | 8501.621437 | 0.000447227 | 163    |
| TLR2   | 5336.009959 | 0.000456621 | 197    |
| EP300  | 9917.500861 | 0.000460405 | 180    |
| IL1B   | 27226.54647 | 0.000517331 | 378    |
| ICAM1  | 5202.954022 | 0.000467946 | 220    |
| APP    | 15283.91069 | 0.00046729  | 195    |
| PPARG  | 12383.94306 | 0.000475964 | 223    |
| VCAM1  | 2631.262192 | 0.000449843 | 184    |
| FABP1  | 1881.6776   | 0.000399521 | 57     |
| NOS3   | 10284.91743 | 0.000464037 | 177    |
| LEP    | 8925.782178 | 0.00044964  | 168    |
| CLU    | 4143.231266 | 0.000424088 | 85     |
| PSEN1  | 1875.489497 | 0.000429185 | 86     |
| SNCA   | 9488.568834 | 0.000440141 | 117    |
| SREBF1 | 2104.897976 | 0.000423908 | 93     |
| MMP9   | 9883.998677 | 0.000480769 | 269    |
| TLR4   | 12858.57066 | 0.000484262 | 262    |
| RHOA   | 10991.58208 | 0.000465983 | 190    |
| IL10   | 9700.843882 | 0.000481464 | 267    |
| IL6    | 40409.98725 | 0.000535332 | 439    |
| INS    | 40930.74841 | 0.000520021 | 362    |
| TNF    | 48101.48299 | 0.000542299 | 452    |
| NR1H4  | 2151.22775  | 0.00040833  | 56     |
| CDC42  | 8783.968905 | 0.000455166 | 155    |
| PPARA  | 10079.85996 | 0.000449843 | 155    |
| ABCB1  | 4207.177985 | 0.000417537 | 66     |
| CD4    | 16410.77617 | 0.000484027 | 273    |
| CCND1  | 4820.392409 | 0.000463177 | 197    |
| ABCG2  | 4593.496555 | 0.000406504 | 56     |
| KDR    | 6530.344001 | 0.000453309 | 165    |
| EGF    | 16574.57967 | 0.000490436 | 286    |
| TP53   | 46966.79921 | 0.000518135 | 371    |
| ERBB2  | 5761.224451 | 0.000462535 | 197    |
| EGFR   | 31394.37456 | 0.000507357 | 335    |

|          |             |             |     |
|----------|-------------|-------------|-----|
| NOTCH1   | 7675.154896 | 0.000464468 | 207 |
| TJP1     | 9814.728118 | 0.000435161 | 100 |
| KIT      | 3124.643237 | 0.000445434 | 155 |
| BCL2L1   | 6997.187399 | 0.000453515 | 174 |
| HSPA4    | 11867.49178 | 0.000468823 | 199 |
| CD34     | 3575.865073 | 0.000447227 | 171 |
| CASP3    | 19455.22329 | 0.000498504 | 306 |
| HNF4A    | 3044.871616 | 0.000426985 | 96  |
| CASP9    | 2097.866561 | 0.000437254 | 126 |
| HSP90AA1 | 17724.09336 | 0.000479846 | 235 |
| CTNNB1   | 28195.3039  | 0.000500501 | 309 |
| ANXA2    | 2599.328727 | 0.000434594 | 87  |
| HTT      | 2924.369091 | 0.000429369 | 93  |
| PTGS2    | 9709.697531 | 0.000463822 | 205 |
| JUN      | 14117.58936 | 0.000492611 | 294 |
| ABL1     | 2166.277303 | 0.000432152 | 108 |
| SRC      | 36928.74378 | 0.000506586 | 323 |
| MAPK8    | 3338.84293  | 0.000453515 | 170 |
| GSTP1    | 2142.096088 | 0.000396668 | 57  |
| RELA     | 3940.492539 | 0.000446429 | 155 |
| ESR1     | 10017.009   | 0.000470146 | 211 |
| CYP2E1   | 1710.609468 | 0.000406504 | 61  |
| VEGFA    | 23399.44977 | 0.000506329 | 343 |
| LGALS3   | 2998.822667 | 0.000427716 | 97  |
| DPP4     | 4585.751093 | 0.000424088 | 75  |
| KCNQ1    | 4937.5902   | 0.000378072 | 56  |
| SNAP25   | 7526.995908 | 0.000401768 | 71  |
| KCNH2    | 5623.82275  | 0.000380084 | 61  |
| SST      | 2253.625851 | 0.000418235 | 68  |
| CNR1     | 1916.953369 | 0.000416667 | 65  |
| GAD2     | 2997.595789 | 0.000402901 | 55  |
| UCP2     | 1907.212265 | 0.000406835 | 52  |
| GCG      | 4205.995888 | 0.00042517  | 93  |
| AQP4     | 3582.736885 | 0.000412031 | 54  |
| ACTN2    | 5976.712461 | 0.000397614 | 53  |
| IGF1R    | 2205.634    | 0.000438982 | 125 |
| SHH      | 2489.204333 | 0.000433088 | 103 |
| TXN      | 4781.745674 | 0.000430108 | 103 |
| MET      | 3860.470936 | 0.000434216 | 109 |
| THY1     | 2383.869928 | 0.0004329   | 111 |
| KLF4     | 3433.88044  | 0.000424088 | 88  |
| NFKBIA   | 3328.238164 | 0.000454752 | 174 |
| MAPK14   | 6019.020017 | 0.000455996 | 177 |
| CAT      | 11323.96642 | 0.000458295 | 183 |

---



|         |             |             |     |
|---------|-------------|-------------|-----|
| PLCG1   | 3038.392761 | 0.000421763 | 94  |
| MDM2    | 2413.374066 | 0.00043802  | 116 |
| PDGFRB  | 2962.560662 | 0.000433651 | 130 |
| HSP90B1 | 2000.20075  | 0.000430849 | 91  |
| FOS     | 13218.43916 | 0.000471698 | 223 |
| CYCS    | 12686.69332 | 0.000456204 | 183 |
| TERT    | 2794.018925 | 0.000419463 | 82  |
| PRKDC   | 5000.423991 | 0.000404858 | 58  |
| CALR    | 3066.366218 | 0.000431406 | 98  |
| WT1     | 1993.314268 | 0.000407166 | 55  |
| MAPT    | 4743.638569 | 0.000434783 | 100 |
| MEF2C   | 1652.115991 | 0.000401929 | 57  |
| STAT5A  | 2259.69822  | 0.000432152 | 136 |
| SMAD4   | 3393.807963 | 0.000438404 | 117 |
| RAC1    | 2099.996896 | 0.000426439 | 98  |
| STAT1   | 4359.905006 | 0.000448229 | 182 |
| BECN1   | 3846.756714 | 0.000440917 | 124 |
| PARP1   | 4688.261252 | 0.000427899 | 100 |
| RUNX2   | 1724.075355 | 0.000432152 | 107 |
| ITGB3   | 4593.418532 | 0.00043573  | 128 |
| ALOX5   | 1628.708134 | 0.000398883 | 57  |
| FOXO3   | 1736.805065 | 0.000440141 | 132 |
| JAK2    | 3012.559813 | 0.00044287  | 154 |
| SQSTM1  | 2494.92734  | 0.000434594 | 111 |
| PRKCD   | 4237.042697 | 0.000432713 | 93  |
| YWHAZ   | 3581.603344 | 0.000428816 | 91  |
| LYN     | 1963.876253 | 0.000426985 | 107 |
| CDKN2A  | 3606.080462 | 0.000448029 | 141 |
| SHC1    | 1626.759047 | 0.000429369 | 111 |
| ENO1    | 2547.812037 | 0.000408831 | 59  |
| PKM     | 1650.943991 | 0.000412031 | 63  |
| FOXO1   | 1922.933105 | 0.00043802  | 121 |
| LDHA    | 2345.87093  | 0.000411353 | 65  |
| SIRT3   | 2331.115661 | 0.000421585 | 74  |
| VTN     | 2225.313341 | 0.000421408 | 91  |
| KNG1    | 6384.70374  | 0.000423549 | 106 |
| REN     | 5200.363827 | 0.000438404 | 113 |
| ITGA5   | 2558.319682 | 0.000405186 | 76  |
| LRRK2   | 5673.343885 | 0.000436681 | 108 |
| AGT     | 2730.689095 | 0.000430849 | 100 |
| CTGF    | 2096.05779  | 0.00043535  | 125 |
| CYBB    | 5492.315127 | 0.000441891 | 126 |
| EDN1    | 6221.053366 | 0.000450653 | 153 |
| NOS1    | 2509.696544 | 0.000422476 | 72  |

---

|          |             |             |     |
|----------|-------------|-------------|-----|
| GFAP     | 4547.898592 | 0.000446229 | 110 |
| GSK3B    | 3320.310766 | 0.000449843 | 139 |
| ENO2     | 1689.015572 | 0.000423191 | 68  |
| CALCA    | 2769.90922  | 0.000410846 | 66  |
| BDNF     | 8844.262538 | 0.000463822 | 183 |
| NGF      | 7665.161579 | 0.000461042 | 172 |
| TAC1     | 7216.192919 | 0.000427716 | 100 |
| HSPG2    | 3796.309235 | 0.00039032  | 67  |
| TXNRD1   | 1704.399196 | 0.000397456 | 65  |
| MYH6     | 3569.57079  | 0.000408163 | 57  |
| GRIA1    | 4338.468093 | 0.000411353 | 67  |
| GRIN2B   | 5253.971137 | 0.000423729 | 79  |
| TIMP1    | 2775.446059 | 0.000440141 | 137 |
| MMP2     | 4489.116716 | 0.000454752 | 176 |
| PIIF     | 5123.237374 | 0.00040404  | 63  |
| CASP1    | 2682.690356 | 0.00043573  | 135 |
| UBA52    | 21298.44203 | 0.000436681 | 127 |
| COL1A1   | 3619.640886 | 0.000421941 | 101 |
| COL3A1   | 1922.916436 | 0.000403551 | 78  |
| PRKCA    | 7838.506168 | 0.000442478 | 114 |
| CXCL8    | 8660.91541  | 0.000481928 | 270 |
| P4HB     | 4784.864075 | 0.000420875 | 83  |
| THBS1    | 5014.432665 | 0.000433839 | 127 |
| VCAN     | 1785.457703 | 0.000397298 | 59  |
| SERPINE1 | 3637.909248 | 0.000443656 | 148 |
| VWF      | 7158.704428 | 0.000443066 | 156 |
| ITGA2B   | 2264.764853 | 0.000410341 | 87  |
| PLG      | 5084.760086 | 0.000439174 | 134 |
| F3       | 1838.489213 | 0.000414938 | 86  |
| IGF1     | 8891.622257 | 0.00047081  | 231 |
| LOX      | 2258.267308 | 0.000434594 | 106 |
| SPARC    | 2020.053606 | 0.000411523 | 72  |
| ENTPD1   | 4063.021868 | 0.000382995 | 62  |
| CRH      | 1645.042403 | 0.00040032  | 60  |
| CCK      | 2738.393125 | 0.000396668 | 60  |
| GRM5     | 3216.048852 | 0.000393236 | 55  |
| ADRB2    | 1787.619939 | 0.000412371 | 60  |
| TRPV1    | 7134.836535 | 0.000423191 | 75  |
| AIF1     | 1691.685406 | 0.000425713 | 91  |
| ARRB1    | 3100.533003 | 0.000422119 | 78  |
| IL4      | 3233.191109 | 0.000457666 | 198 |
| CXCL12   | 2659.009239 | 0.000448833 | 185 |
| S100B    | 1650.104684 | 0.000412541 | 54  |
| HMGB1    | 2112.393424 | 0.000435161 | 111 |

---

|        |             |             |     |
|--------|-------------|-------------|-----|
| MYD88  | 2191.009277 | 0.000434028 | 139 |
| ITGB2  | 1638.822404 | 0.000414079 | 102 |
| RAB7A  | 3033.182344 | 0.000407498 | 58  |
| TGFB1  | 5499.036955 | 0.000451467 | 165 |
| CTSD   | 3319.500446 | 0.000422297 | 76  |
| MAP2K1 | 3002.358626 | 0.000440335 | 120 |
| SPP1   | 3061.103698 | 0.000441891 | 147 |
| DNM2   | 3378.016519 | 0.000404204 | 52  |
| BMP4   | 3161.46007  | 0.000424989 | 104 |
| HMOX1  | 6640.549658 | 0.00045106  | 147 |
| IFNG   | 2498.608477 | 0.000453309 | 178 |
| SOD1   | 5565.115585 | 0.000438982 | 128 |
| EEF2   | 1962.598855 | 0.000406669 | 57  |
| HSPA5  | 8597.355019 | 0.000453104 | 146 |
| IL17A  | 2033.570434 | 0.000442674 | 158 |
| GAD1   | 2338.427461 | 0.000401284 | 61  |
| GDNF   | 2910.140722 | 0.000422297 | 71  |
| ITGAX  | 2288.336814 | 0.000424989 | 137 |
| NOD2   | 3802.253319 | 0.000403063 | 84  |
| CASP8  | 5741.156096 | 0.000448833 | 164 |
| FLT1   | 1600.976095 | 0.000431406 | 98  |
| EPRS   | 4298.900279 | 0.000413052 | 68  |
| LMNA   | 2909.850692 | 0.000427533 | 79  |
| SOD2   | 3474.461048 | 0.00043122  | 111 |
| HSPD1  | 2218.702113 | 0.00042337  | 84  |
| PTGS1  | 2666.559804 | 0.000396825 | 53  |
| IL13   | 2042.910625 | 0.00042735  | 141 |
| HGF    | 2952.976403 | 0.000444642 | 149 |
| VCP    | 1931.026733 | 0.000410341 | 62  |
| CDH5   | 2331.766827 | 0.00042517  | 92  |
| IL2    | 3932.546071 | 0.000455581 | 182 |
| FAS    | 2198.736989 | 0.000419111 | 101 |
| CD40   | 2140.783168 | 0.0004329   | 156 |
| CCNB1  | 2014.052326 | 0.000417362 | 85  |
| DNM1L  | 2780.633928 | 0.00040016  | 65  |
| MAP2K4 | 1719.401212 | 0.000398406 | 52  |
| B2M    | 2693.709529 | 0.000429    | 102 |
| SP1    | 1835.680155 | 0.000427168 | 92  |
| MAPK9  | 2365.618075 | 0.000421053 | 81  |
| IKBKG  | 2215.955772 | 0.000421408 | 91  |
| XBP1   | 3651.276178 | 0.000418585 | 76  |
| ETS1   | 1732.381093 | 0.00041425  | 70  |

---
